# Supplementary material
Source: PubMed Central journal article supplement (PMC7403752)
Supplement: mmc1.pdf [file mmc1.pdf]

# Use of Balloon Atrial Septostomy in Patients With Advanced Pulmonary Arterial Hypertension

## A Systematic Review and Meta-Analysis

*Muhammad Shahzeb Khan, MD; Muhammad Mustafa Memon, MBBS;  
Emaan Amin, MBBS; Naser Yamani, MD; Safi U. Khan, MD;  
Vincent M. Figueredo, MD; Salil Deo, MD; Jonathan D. Rich, MD;  
Raymond L. Benza, MD; and Richard A. Krasuski, MD*

CHEST 2019; 156(1):53-63

*Online supplements are not copyedited prior to posting and the author(s) take full responsibility for the accuracy of all data.*

© 2019 AMERICAN COLLEGE OF CHEST PHYSICIANS. Reproduction of this article is prohibited without written permission from the American College of Chest Physicians. See online for more details. DOI: 10.1016/j.chest.2019.03.003

**e-Table 1.** Search strategy used in each database searched.

| Database           | Search Strategy                                                                                                                                                                                                                                                                                                                                                                                                                                                                                                                                                                            | Articles retrieved |
|--------------------|--------------------------------------------------------------------------------------------------------------------------------------------------------------------------------------------------------------------------------------------------------------------------------------------------------------------------------------------------------------------------------------------------------------------------------------------------------------------------------------------------------------------------------------------------------------------------------------------|--------------------|
| MEDLINE            | ((Balloon[All Fields] AND ("heart atria"[MeSH Terms] OR ("heart"[All Fields] AND "atria"[All Fields]) OR "heart atria"[All Fields] OR "atrial"[All Fields]) AND septostomy[All Fields]) OR BAS[All Fields] OR (("heart atria"[MeSH Terms] OR ("heart"[All Fields] AND "atria"[All Fields]) OR "heart atria"[All Fields] OR "atrial"[All Fields]) AND septostomy[All Fields])) AND ("hypertension, pulmonary"[MeSH Terms] OR ("hypertension"[All Fields] AND "pulmonary"[All Fields]) OR "pulmonary hypertension"[All Fields] OR ("pulmonary"[All Fields] AND "hypertension"[All Fields]))) | 176                |
| Cochrane Library   | (Balloon atrial septostomy or BAS or atrial septostomy) and (pulmonary hypertension):ti,ab,kw                                                                                                                                                                                                                                                                                                                                                                                                                                                                                              | 18                 |
| Clinicaltrials.gov | Balloon atrial septostomy OR BAS OR atrial septostomy   pulmonary hypertension                                                                                                                                                                                                                                                                                                                                                                                                                                                                                                             | 41                 |
| Scopus             | TITLE-ABS-KEY ( ( balloon AND atrial AND septostomy OR bas OR atrial AND septostomy ) AND ( pulmonary AND hypertension ) )                                                                                                                                                                                                                                                                                                                                                                                                                                                                 | 146                |
